# Supplementary material for: Identifying topology of distribution substation in power Internet of Things using dynamic voltage load fluctuation flow analysis
Source: PeerJ Comput Sci. 2024 Feb 8;10:e1688. doi: 10.7717/peerj-cs.1688 (PMC10909208; doi:10.7717/peerj-cs.1688)
Supplement: Supplemental Information 1 [file peerj-cs-10-1688-s001.xlsx]

## Sheet: Figure 7a
Error test results of the HMM algorithm: 50 samples
The number of iterations	Error
	n=5%	n=10%	n=15%	n=16%	n=17%	n=18%
10	0.457	0.446	0.44	0.43	0.427	0.42
100	0.406	0.359	0.336	0.292	0.271	0.241
500	0.357	0.277	0.236	0.17	0.142	0.107
700	0.264	0.151	0.098	0.033	0.027	0.026
1000	0.192	0.055	0.012	0.007	0.007	0.007

## Sheet: Figure 7b
10	0.38	0.332	0.309	0.267	0.254
100	0.215	0.056	0.017	0.009	0.009
500	0.0045	2.1e-05	5.1e-05	3e-05	2.1e-06
700	0.00031	1e-05	3.1e-05	2e-06	1.1e-06
1000	5.6e-05	8.9e-06	8.1e-06	6e-07	8.9e-07
10	0.335	0.277	0.256	0.231	0.217	0.194
100	0.219	0.O65	0.029	0.014	0.014	0.014
500	0.105	0.005	1e-05	3e-09	3e-09	3e-10
700	0.003	4e-07	2e-06	2e-09	2e-09	2e-10
1000	0.001	0.01	0.001	0.001	0.001	0.001
10	0.457	0.446	0.44	0.43	0.427	0.42
100	0.406	0.359	0.336	0.292	0.271	0.241
500	0.357	0.277	0.236	0.17	0.142	0.107
700	0.264	0.151	0.098	0.0334	0.027	0.026
1000	0.192	0.055	0.012	0.007	0.007	0.007
10	0.469	0.455	0.449	0.438	0.434	0.429
100	0.424	0.373	0.346	0.298	0.274	0.241
500	0.362	0.289	0.253	0.194	0.167	0.131
700	0.275	0.154	0.102	0.038	0.036	0.035
1000	0.027	0.081	0.036	0.023	0.023	0.013

## Sheet: Figure 7c
0.38	0.332	0.309	0.267	0.254
0.215	0.056	0.017	0.009	0.009
0.0045	2.1e-05	5.1e-05	3e-05	2.1e-06
0.00031	1e-05	3.1e-05	2e-06	1.1e-06
5.6e-05	8.9e-06	8.1e-06	6e-07	8.9e-07
0.335	0.277	0.256	0.231	0.217	0.194
0.219	0.O65	0.029	0.014	0.014	0.014
0.105	0.005	1e-05	3e-09	3e-09	3e-10
0.003	4e-07	2e-06	2e-09	2e-09	2e-10
0.001	0.01	0.001	0.001	0.001	0.001
0.457	0.446	0.44	0.43	0.427	0.42
0.406	0.359	0.336	0.292	0.271	0.241
0.357	0.277	0.236	0.17	0.142	0.107
0.264	0.151	0.098	0.0334	0.027	0.026
0.192	0.055	0.012	0.007	0.007	0.007
0.469	0.455	0.449	0.438	0.434	0.429
0.424	0.373	0.346	0.298	0.274	0.241
0.362	0.289	0.253	0.194	0.167	0.131
0.275	0.154	0.102	0.038	0.036	0.035
0.027	0.081	0.036	0.023	0.023	0.013
0.471	0.458	0.455	0.45	0.447	0.441
0.437	0.405	0.386	0.36	0.347	0.329
0.409	0.361	0.337	0.294	0.273	0.243
0.352	0.284	0.248	0.189	0.162	0.127
0.315	0.225	0.181	0.108	0.074	0.038

## Sheet: Figure 7d
10	0.38	0.332	0.309	0.267	0.254
100	0.215	0.056	0.117	0.009	0.009
500	0.0045	2.1e-05	5.1e-05	3e-05	2.1e-06
700	0.00031	1e-05	3.1e-05	2e-06	1.1e-06
1000	5.6e-05	8.9e-06	8.1e-06	6e-07	8.9e-07
10	0.335	0.277	0.256	0.231	0.217	0.194
100	0.219	0.O65	0.029	0.014	0.014	0.014
500	0.105	0.005	1e-05	3e-09	3e-09	3e-10
700	0.003	4e-07	2e-06	0.011	2e-09	2e-10
1000	0.001	0.01	0.001	0.001	0.001	0.001
10	0.457	0.446	0.44	0.43	0.427	0.42
100	0.406	0.359	0.336	0.292	0.271	0.241
500	0.357	0.277	0.236	0.17	0.142	0.107
700	0.264	0.151	0.098	0.0334	0.027	0.026
1000	0.192	0.055	0.012	0.007	0.007	0.007
10	0.469	0.455	0.449	0.438	0.434	0.429
100	0.424	0.373	0.346	0.298	0.274	0.241
500	0.362	0.289	0.253	0.194	0.167	0.131
700	0.275	0.154	0.102	0.038	0.036	0.035
1000	0.027	0.081	0.036	0.023	0.023	0.013
10	0.471	0.458	0.455	0.45	0.447	0.441
100	0.437	0.405	0.386	0.36	0.347	0.329
500	0.409	0.361	0.337	0.294	0.273	0.243
700	0.352	0.284	0.248	0.189	0.162	0.127
1000	0.315	0.225	0.181	0.108	0.074	0.038

## Sheet: Figure 8a
9.33364	262.252	12.7809	264.594
43.5502	879.833	15.1468	775.635
55.5425	1057.79	25.2691	1291.94
72.23	2342.71	34.5662	1722.79
85.6166	3285.77	55.0302	2246.12
96.3446	4396.83	72.6528	3361.87
117.654	6958.47	85.1044	4474.1
126.622	8153.24	93.3933	5243.88
136.525	9178.84	110.833	6784.03
145.419	10543.4	123.78	8745.65
151.05	11481.2	137.407	11132.3
159.119	12760.2	151.289	12924.7
164.822	13528.2	165.172	14717.2
171.241	14636.4	175.681	16337.5
180.063	16170.7	183.071	17191.6
190.901	17027.1	--	--
194.201	17369	--	--
1.59216	0.04487	4.75462	0.14531
5.36651	0.03281	7.03515	0.12054
10.3521	0.0154	9.24388	0.08371
18.4628	0.00737	11.6165	0.05156
27.8331	0.00536	23.9885	0.0154
41.073	0.00402	43.7765	0.00134
53.3107	0.00402	60.886	0.000669643
63.7769	0.00335	76.2706	0.000669643
74.6394	0.00402	89.5339	0
86.1779	0.00402	100	-0.000669643
93.4971	0.00335	--	--
99.4412	0.00335	--	--
0.85172	0.14212	-0.19511	0.12559
4.20231	0.11492	12.303	0.08208
7.19458	0.08341	23.9325	0.04932
12.9202	0.05339	45.6382	0.03184
22.6287	0.01556	99.0864	0.01721
43.5108	0.00309
71.747	0.00298
94.4882	0.00347

## Sheet: Figure 8b
9.33364	262.252	12.7809	264.594
43.5502	879.833	15.1468	775.635
55.5425	1057.79	25.2691	1291.94
72.23	2342.71	34.5662	1722.79
85.6166	3285.77	55.0302	2246.12
96.3446	4396.83	72.6528	3361.87
117.654	6958.47	85.1044	4474.1
126.622	8153.24	93.3933	5243.88
136.525	9178.84	110.833	6784.03
145.419	10543.4	123.78	8745.65
151.05	11481.2	137.407	11132.3
159.119	12760.2	151.289	12924.7
164.822	13528.2	165.172	14717.2
171.241	14636.4	175.681	16337.5
180.063	16170.7	183.071	17191.6
190.901	17027.1	--	--
194.201	17369	--	--
1.59216	0.04487	4.75462	0.14531
5.36651	0.03281	7.03515	0.12054
10.3521	0.0154	9.24388	0.08371
18.4628	0.00737	11.6165	0.05156
27.8331	0.00536	23.9885	0.0154
41.073	0.00402	43.7765	0.00134
53.3107	0.00402	60.886	0.000669643
63.7769	0.00335	76.2706	0.000669643
74.6394	0.00402	89.5339	0
86.1779	0.00402	100	-0.000669643
93.4971	0.00335	--	--
99.4412	0.00335	--	--
1.75526	0.12035	0.29462	0.13124
10.7515	0.07681	10.71	0.08463
21.6109	0.05754	21.2416	0.05206
43.5661	0.04946	44.4624	0.03073
68.2891	0.04535	99.5104	0.01796
92.2154	0.04122
98.5974	0.03981
